# Supplementary material for: Negative regulation of G2-M by ATR (mei-41)/Chk1(Grapes) facilitates tracheoblast growth and tracheal hypertrophy in Drosophila
Source: eLife. 2018 Apr 16;7:e29988. doi: 10.7554/eLife.29988 (PMC5953539; doi:10.7554/eLife.29988)
Supplement: Figure 1—source data 1. [file elife-29988-fig1-data1.xlsx]

## Sheet: Figure 1G
		WL3		L2		0-8 h L3		Bin Range
	G1	256.868		4576.93		4324.06		2000
		573.023		4015.06		4810.8		4000
		622.511		4280.99		5041.58		6000
		877.65		4329.37		5621.78		8000
		921.355		4349.3		5697.08
		1058.04		4368.29		6169.93
		1130.36		4393.35		6567.4
		1266.3		4601.19		7324.14
		1327.37		4627.5		8076.61
		1397.98		4655.32		8443.53
		1482.36		4662.89		9765.91
		1494.82		4709.89		10277.2
		1538.45		4797.98		11770.7
				4893.71		18747.2
	G2	4959.41		5009.3
		4994.9		5039.41
		5529.26		5121.57
		5818.82		5282.07
		5823.57		5826.07
		5999.36		6239.72
		6148.81		6391.91
		6290.36		6767.98
		6328.53		6888.65
		6395.06
		6611.55
		6887.69
		7351.49
		7692.37
		7768.12

## Sheet: figure 1I
	L2	0-8 h L3	16-24 h L3	32-40 h L3	WL3
	18	19	18	26	150
	16	20	19	29	162
	19	18	19	28	324
	18	18	18	21	265
	18	19	20	23	205
	17	18	17	27	230
	18	18	16	24	247
	18	17	18	26	222
	19	18	19	26	194
	20	19	18	28	287
Average	18.1	18.4	18.2	25.8	228.6
STDEV	1.1005	0.843274	1.13529	2.48551	54.3532
TTEST				7.61016e-06	9.08158e-07
