# Supplementary material for: Negative regulation of G2-M by ATR (mei-41)/Chk1(Grapes) facilitates tracheoblast growth and tracheal hypertrophy in Drosophila
Source: eLife. 2018 Apr 16;7:e29988. doi: 10.7554/eLife.29988 (PMC5953539; doi:10.7554/eLife.29988)
Supplement: Figure 2—source data 1. [file elife-29988-fig2-data1.xlsx]

## Sheet: Sheet1
	L2		0-8 h L3		16-24 h L3		32-40 h L3		48-56 h L3		WL3
	Control	Chk1ir	Control	Chk1ir	Control	Chk1ir	Control	Chk1ir	Control	Chk1ir	Control	Chk1ir
	16	20	18	21	19	49	26	71	61	74	215	170
	15	19	19	22	19	51	29	69	49	75	257	151
	16	21	17	24	18	46	28	72	50	93	227	176
	17	22	16	20	20	44	21	74	56	82	231	177
	15	19	18	23	17	45	23	68	57	107	206	141
	18	22	19	22	16	48	27	77	55	103	210	143
	17	24	17	19	18	50	23	79	49	86	278	173
	16	21	18	21	19	47	25	73	57	107	232	167
	15	20	19	23	18	52	26	78	55	103	234	171
	18	23	16	24	17	41	27	75	49	86	223	180
Average	16.3	21.1	17.7	21.9	18.1	47.3	25.5	73.6	53.8	91.6	231.3	164.9
STDEV	1.1595	1.66333	1.1595	1.66333	1.19722	3.40098	2.50555	3.71782	4.26354	12.808	21.8482	14.4334
ttest						6.44096e-10		1.50861e-10		5.51792e-06		5.86307e-06
