# Supplementary material for: Negative regulation of G2-M by ATR (mei-41)/Chk1(Grapes) facilitates tracheoblast growth and tracheal hypertrophy in Drosophila
Source: eLife. 2018 Apr 16;7:e29988. doi: 10.7554/eLife.29988 (PMC5953539; doi:10.7554/eLife.29988)
Supplement: Figure 4—source data 1. [file elife-29988-fig4-data1.xlsx]

## Sheet: Figure 4A
	Cdc2AF no heat shock				Cdc2AF heat shock
	L2	0-8 h L3	32-40 h L3		L2	0-8 h L3	32-40 h L3
	18	19	55		17	25	73
	20	14	53		16	41	61
	15	18	46		18	40	75
	18	19	36		16	33	51
	18	20	47		17	33	83
	18	19	43		20	30	84
		19	68		18	34	72
		19	45		17	31	58
		19	28		17	39	86
		19	53		18	31	107
Average	17.8333	18.5	47.4		17.4	33.7	75
STDEV	1.60208	1.64992	10.9463		1.17379	5.01221	16.207
