# Supplementary material for: Negative regulation of G2-M by ATR (mei-41)/Chk1(Grapes) facilitates tracheoblast growth and tracheal hypertrophy in Drosophila
Source: eLife. 2018 Apr 16;7:e29988. doi: 10.7554/eLife.29988 (PMC5953539; doi:10.7554/eLife.29988)
Supplement: Figure 6—source data 1. — Figure 6D: Numerical data for measurements of length and width in wild type and Chk1RNAi or Chk1-expressing larvae at 32–40 h L3. [file elife-29988-fig6-data1.xlsx]

## Sheet: Fugure 6A
Length
	L1	L2	0-8 h L3	32-40 h L3	WL3
	101.203	117.532	197.389	340.36	311.524
	104.668	132.008	204.326	324.539	330.485
	105.981	117.495	228.901	308.404	374.849
	82.556	118.082	214.132	288.817	302.791
	111.496	122.361	220.034	288.17	297.567
	99.999	128.234	239.444	292.991	286.734
	96.494	148.29	229.467	301.061	284.172
Average	100.342	126.286	219.099	306.335	312.589
STDEV	9.19179	11.2349	14.9031	19.7319	31.6104
pValue		0.000489708	1.72268e-08	7.50292e-07	0.66491

## Sheet: Figure 6B
Width
	L1	L2	0-8 L3	32-40 L3	WL3
	10.3755	11.0865	23.286	27.768	31.329
	9.495	10.0585	19.038	25.493	27.826
	9.4635	10.195	19.1575	23.872	25
	9.80767	13.829	21.5477	27.0103	27.5783
	11.0357	12.798	22.3837	28.025	27.4513
	10.6813	12.5637	18.63	28.0493	31.361
	6.573	11.386	21.4217	29.467	27.9907
Average	9.6331	11.7024	20.7806	27.0978	28.3623
STDEV	1.47533	1.40941	1.83223	1.86262	2.27188
pValue		0.0199164	2.36374e-07	3.41774e-05	0.277008

## Sheet: Figure 6C
	L2	0-8 h L3	24 h L3	WL3
	16411	16530	22177	3572
	9307	18294	31524	3395
	12848	18779	24884	3871
	10883	12327	23482	3870
	7648	13843	19207	3252
	13915	11340	24307	2721
	14064	21173	15627	2241
	9637	11205	20089	2077
	12935	17336	25403	1536
	10654	14307	19179	2526
	12192	20970	19893	1895
	15318	17190	30157	1953
	10445	16120	18152	5803
	7701	12601	25554	3750
	6927	17507	22234	3364
average	11392.3	15968.1	22791.3	3055.07
SD	2877.93	3245.53	4369.19	1094.13
ttest		0.000235883	0.000297669	1.27594e-10
				1.58109e-07

## Sheet: Figure 6D
	Wild type			Chk1RNAi			UAS Chk1
	Length	Width		Length	Width		Length	Width
	329.858	27.768		226.863	23.262		334.902	31.794
	324.506	25.493		262.397	20.757		344.334	31.6765
	315.99	23.872		263.739	21.587		346.295	34.2915
	326.029	25.863		250.678	19.542		359.842	35.296
	325.01	27.82		260.319	20.823		358.936	30.438
	345.882	26.035		237.033	26.942		363.541	33.728
				273.057	22.479
				253.441	22.1989
				229.767	25.187
				225.659	22.983
				245.195	26.373
Average	327.879	26.1418		248.013	22.9213		351.308	32.8707
STDEV	9.9238	1.49151		16.3641	2.37357		11.1678	1.85144
pValue				1.74509e-08	0.00911522		0.00325792	4.03119e-05
